# Supplementary material for: Oxidative Balance Score and New-Onset Type 2 Diabetes Mellitus in Korean Adults without Non-Alcoholic Fatty Liver Disease: Korean Genome and Epidemiology Study-Health Examinees (KoGES-HEXA) Cohort
Source: MDPI journal article supplement (doi:10.3390/antiox13010107), 2024-01-16
Supplement: s1 [file s1]

## Supplementary Materials

**Supplementary Table S1.** Hazard ratios and 95% confidence intervals from univariable and multivariable (model 1-3) analyses of the type 2 diabetes incidence by oxidative balance score and variables of baseline characteristics.

| Variables                     | Univariable      |         | Model 1          |         | Model 2          |         | Model 3          |         |
|-------------------------------|------------------|---------|------------------|---------|------------------|---------|------------------|---------|
|                               | HR (95% CI)      | p value |
| OBS                           |                  |         |                  |         |                  |         |                  |         |
| Group 1                       | reference        |         | reference        |         | reference        |         | reference        |         |
| Group 2                       | 0.78 (0.53-1.15) | 0.211   | 0.76 (0.52-1.12) | 0.164   | 0.78 (0.52-1.16) | 0.213   | 0.79 (0.53-1.18) | 0.247   |
| Group 3                       | 0.66 (0.44-0.99) | 0.046   | 0.66 (0.44-0.99) | 0.044   | 0.62 (0.40-0.95) | 0.029   | 0.60 (0.39-0.93) | 0.023   |
| Men                           | 1.95 (1.40-2.73) | <.001   | 1.55 (1.10-2.19) | 0.012   | 0.75 (0.50-1.15) | 0.185   | 0.93 (0.51-1.68) | 0.806   |
| Age (year)                    | 1.06 (1.04-1.09) | <.001   | 1.06 (1.04-1.08) | <0.001  | 1.05 (1.03-1.07) | <0.001  | 1.03 (1.01-1.06) | 0.009   |
| BMI (kg/m <sup>2</sup> )      | 1.19 (1.11-1.28) | <.001   |                  |         | 1.07 (0.96-1.19) | 0.222   | 1.06 (0.95-1.19) | 0.270   |
| WC (cm)                       | 1.07 (1.05-1.09) | <.001   |                  |         | 1.02 (0.98-1.05) | 0.354   | 1.02 (0.99-1.06) | 0.245   |
| Systolic BP (mmHg)            | 1.03 (1.02-1.04) | <.001   |                  |         | 1.02 (1.00-1.04) | 0.021   | 1.02 (1.00-1.04) | 0.069   |
| Diastolic BP (mmHg)           | 1.04 (1.02-1.05) | <.001   |                  |         | 1.00 (0.97-1.03) | 0.938   | 1.00 (0.98-1.03) | 0.753   |
| FPG (mg/dl)                   | 1.03 (1.03-1.04) | <.001   |                  |         | 1.03 (1.03-1.04) | <0.001  | 1.03 (1.03-1.04) | <0.001  |
| Total cholesterol (mg/dl)     | 1.00 (0.99-1.00) | 0.838   |                  |         | 0.99 (0.99-1.00) | 0.047   | 0.99 (0.99-1.00) | 0.003   |
| HDL cholesterol (mg/dl)       | 0.97 (0.95-0.98) | <.001   |                  |         | 0.99 (0.98-1.01) | 0.513   | 1.01 (0.99-1.03) | 0.321   |
| Triglyceride (mg/dl)          | 1.00 (1.00-1.00) | <.001   |                  |         | 1.00 (1.00-1.00) | 0.084   | 1.00 (1.00-1.00) | 0.372   |
| Smoking status <sup>a</sup>   |                  |         |                  |         |                  |         |                  |         |
| Never smoker                  | reference        |         |                  |         |                  |         | reference        |         |
| Former smoker                 | 1.52 (0.98-2.37) | 0.064   |                  |         |                  |         | 0.72 (0.38-1.39) | 0.331   |
| Current smoker                | 2.38 (1.46-3.89) | <.001   |                  |         |                  |         | 0.71 (0.32-1.56) | 0.392   |
| Alcohol intake <sup>b</sup>   |                  |         |                  |         |                  |         |                  |         |
| Never drinker                 | reference        |         |                  |         |                  |         | reference        |         |
| Former drinker                | 2.67 (1.46-4.88) | 0.001   |                  |         |                  |         | 2.10 (1.07-4.14) | 0.031   |
| Current drinker               | 0.86 (0.60-1.22) | 0.396   |                  |         |                  |         | 0.76 (0.51-1.14) | 0.179   |
| Regular exercise <sup>c</sup> | 1.02 (0.73-1.42) | 0.908   |                  |         |                  |         | 1.23 (0.87-1.76) | 0.245   |
| Hypertension                  | 3.13 (2.23-4.39) | <.001   |                  |         |                  |         | 1.35 (0.92-1.99) | 0.127   |
| Dyslipidemia                  | 2.65 (1.91-3.67) | <.001   |                  |         |                  |         | 2.26 (1.45-3.50) | <0.001  |
| CKD                           | 2.93 (0.94-9.21) | 0.065   |                  |         |                  |         | 2.05 (0.64-6.55) | 0.225   |

|                     |                  |       |                  |       |
|---------------------|------------------|-------|------------------|-------|
| Total energy intake | 0.88 (0.57-1.35) | 0.550 | 1.06 (0.60-1.90) | 0.836 |
|---------------------|------------------|-------|------------------|-------|

Data are expressed as the mean (SD), median (IQR) or percentage.

Abbreviations: OBS, oxidative balance score; BMI, Body mass index; WC, Waist circumference; BP, blood pressure; FPG, fasting plasma glucose; HDL, high density lipoprotein; CKD, chronic kidney disease; eGFR, estimated glomerular filtration rate; LDL, low-density lipoprotein.

*p* values were calculated with the use of ANOVA-test or chi-square test.

<sup>a</sup>Never smoker, participants who had never smoked or had smoked < 100 cigarettes in their lifetime; Former smoker, participants who had quit smoking and had smoked ≥100 cigarettes in their lifetime; Current smoker, participants who had smoked > 100 cigarettes in their lifetime and answered "currently smoking".

<sup>b</sup>Never drinker, participants who answered "None" in the questionnaire; Light and moderate drinker, 0–209 g/week in men, 0–139 g/week in women; Heavy drinker, ≥210 g/week in men, ≥140 g/week in women.

<sup>c</sup>Regularly performing an exercise that causes sweating.

Hypertension, SBP ≥ 140 mmHg or DBP ≥ 90 mmHg, or current use of hypertensive medication; CKD, eGFR < 60 mL/min/1.73 m<sup>2</sup>; Dyslipidemia, satisfying one of the following criteria: (1) serum LDL-cholesterol ≥ 160 mg/dL or taking lipid-lowering drug; (2) serum HDL-cholesterol < 40 mg/dL; (3) serum triglyceride ≥ 200 mg/dL.

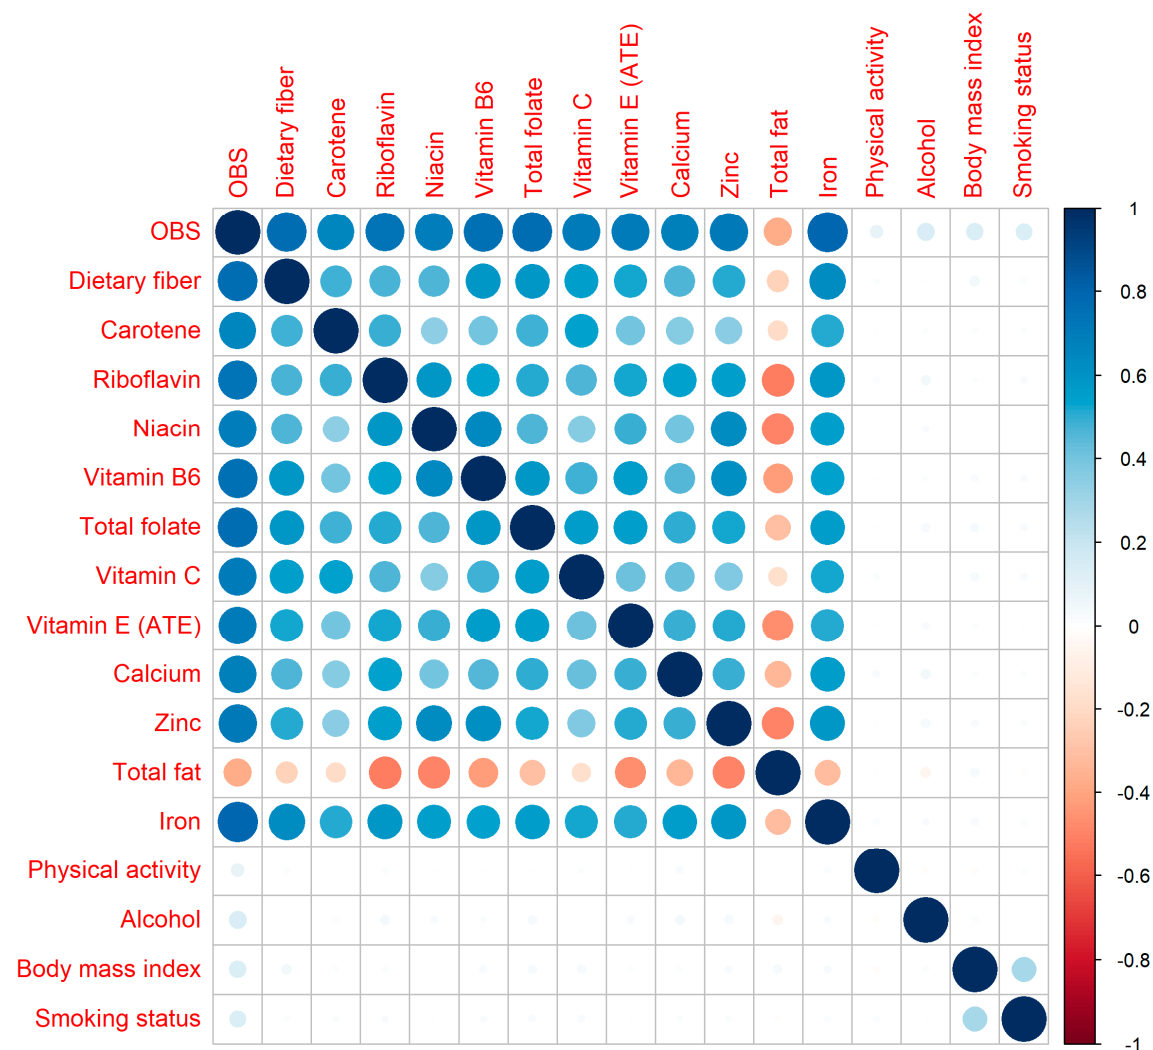

**Supplementary Figure S1.** Correlations between the OBS and the OBS components. The color values of the cells are scaled cells are scaled from red (negative correlation) to blue (positive correlation), proportional to the strength of the association, as indicated in the color scale (at the right side of the panel). Abbreviations: OBS, oxidative balance score; ATE, alpha-tocopherol equivalents.
